# Supplementary material for: Magnetically separable Ag3PO4/NiFe2O4composites with enhanced photocatalytic activity
Source: Royal Society of Chemistry journal article supplement (doi:10.1039/c5dt03173g), 2015-01-01
Supplement: c5dt03173g1.pdf [file c5dt03173g1.pdf]

## Supporting Information

### **Magnetically Separable $\text{Ag}_3\text{PO}_4/\text{NiFe}_2\text{O}_4$ composites with Enhanced Photocatalytic Activity**

*Santosh S. Patil<sup>a,b</sup> Mohaseen S. Tamboli,<sup>a</sup> Virendrakumar G. Deonikar,<sup>a</sup> Govind G. Umarji,<sup>a</sup>  
Jalindar D. Ambekar,<sup>a</sup> Milind V. Kulkarni,<sup>a</sup> Sanjay S. Kolekar,<sup>\*b</sup> Bharat B. Kale<sup>\*a</sup> and Deepak  
R. Patil<sup>\*a</sup>*

<sup>a</sup>Centre for Materials for Electronics Technology (C-MET), Pune, Department of Electronics and Information Technology (DeitY), Govt. of India

Corresponding author. E-mail address: deepphy24@gmail.com (Dr. Deepak Patil),  
bbkale1@gmail.com (Dr. B. B. Kale), Tel.: +91(020) 25898724; Fax: +91(020)25898085.

<sup>b</sup>Analytical Chemistry and Material Science Research Laboratory, Department of Chemistry,  
Shivaji University, Kolhapur, India

sskolekar@gmail.com (Dr. S. S. Kolekar)

Figure S1: XRD pattern of APO, NFO and APO/NFO heterojunction photocatalyst

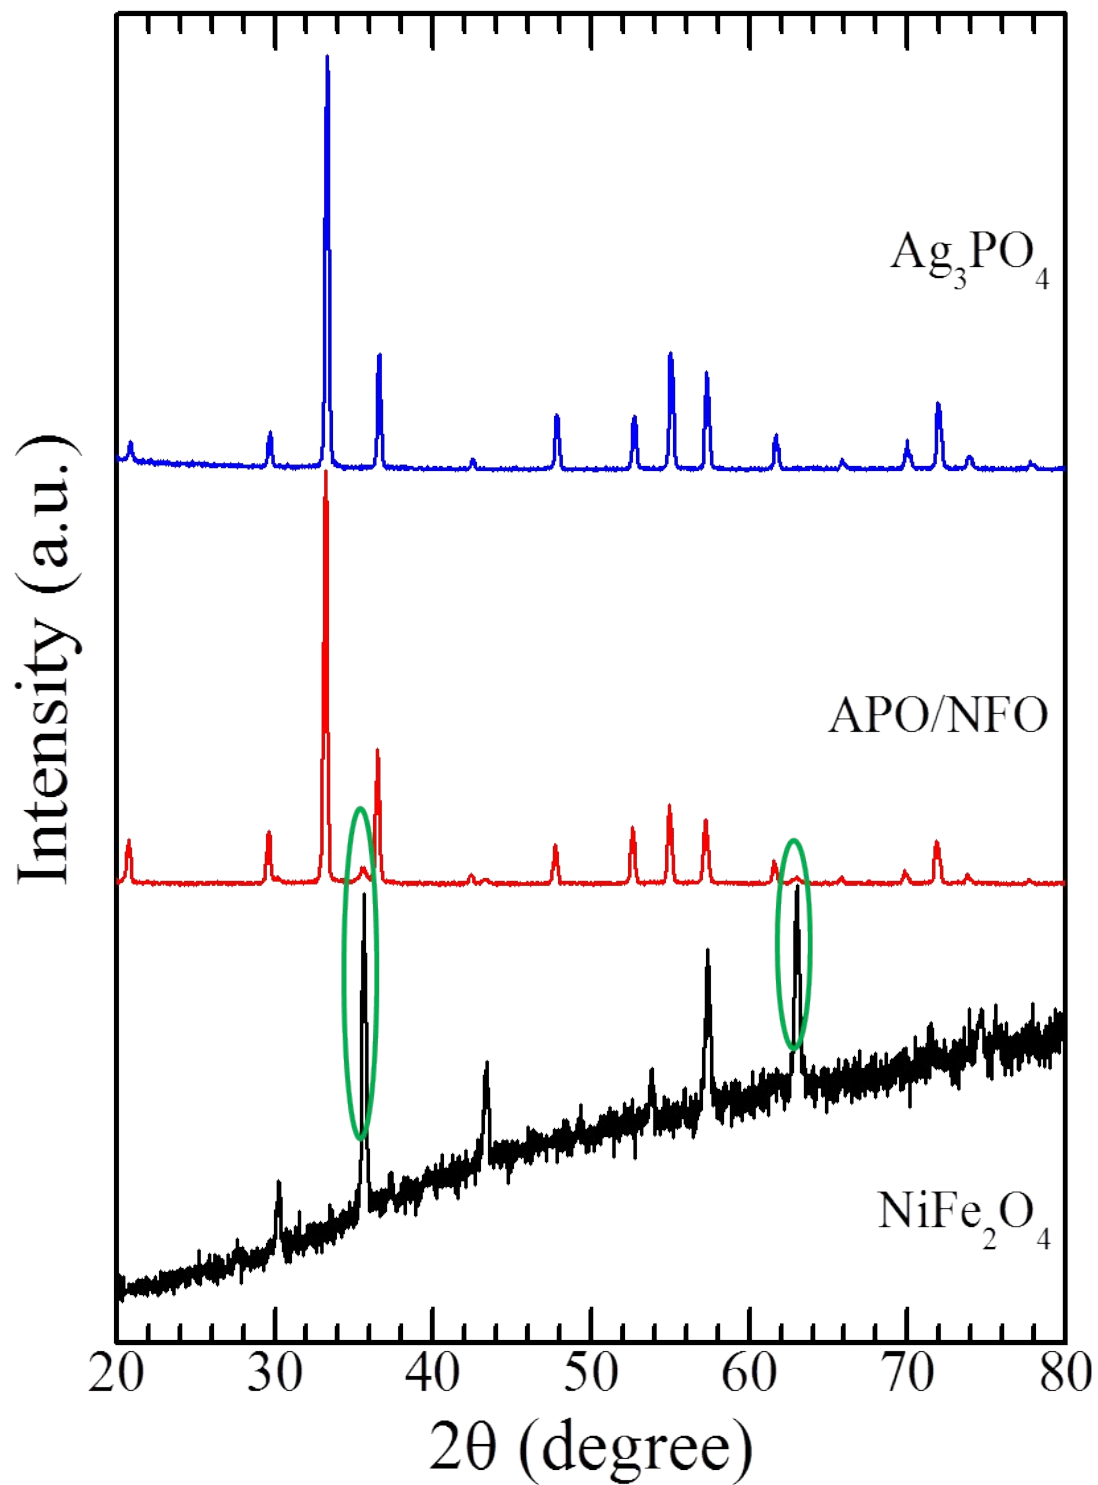

**Figure S2: FESEM images of APO**

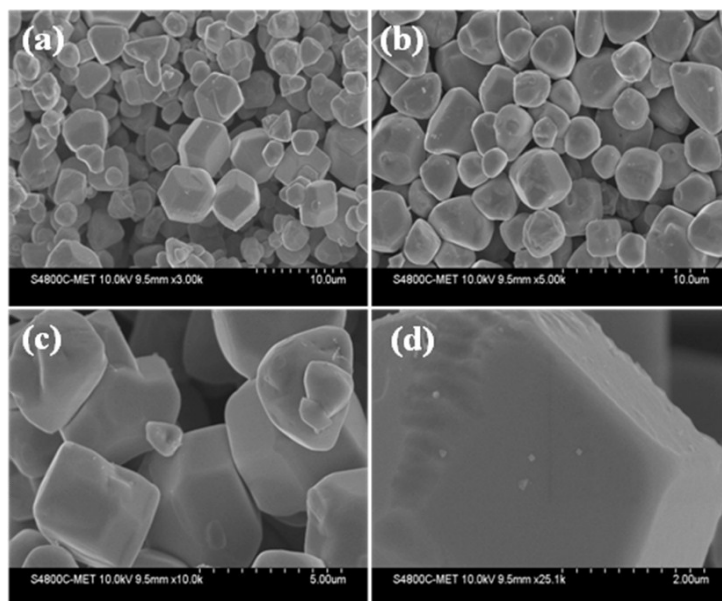

**Figure S3: FESEM images of APO/NFO composite with low magnifications**

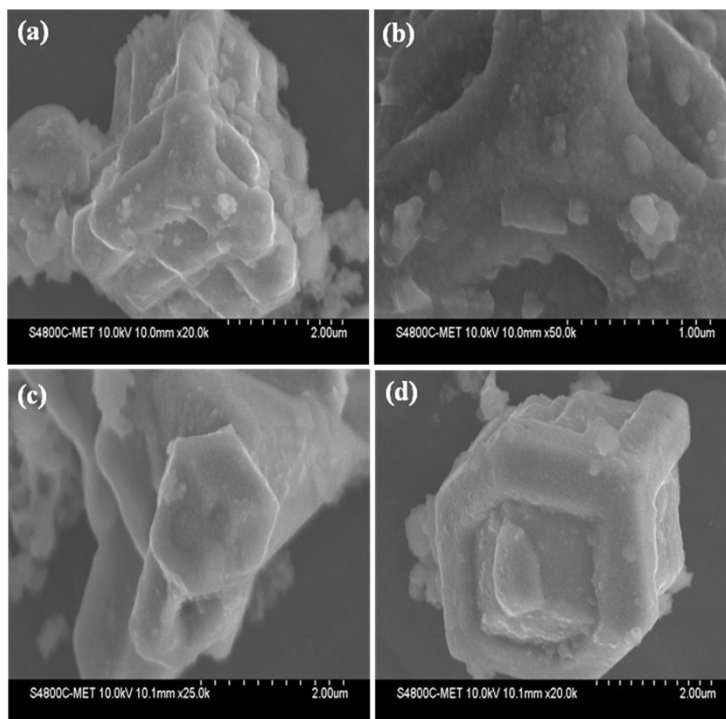

**Figure S4: FESEM images of APO/NFO with high magnifications**

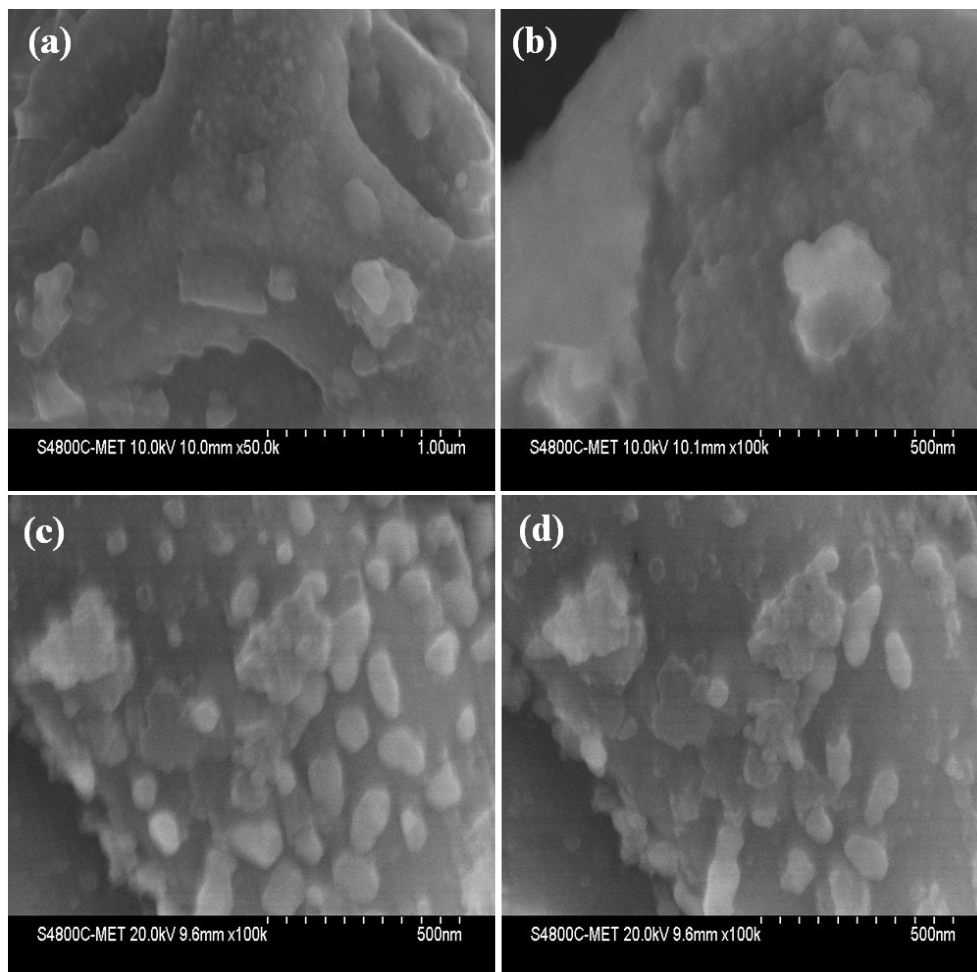

**Figure S5: Photocatalytic activity for MB degradation using APO/NFO5 photocatalyst**

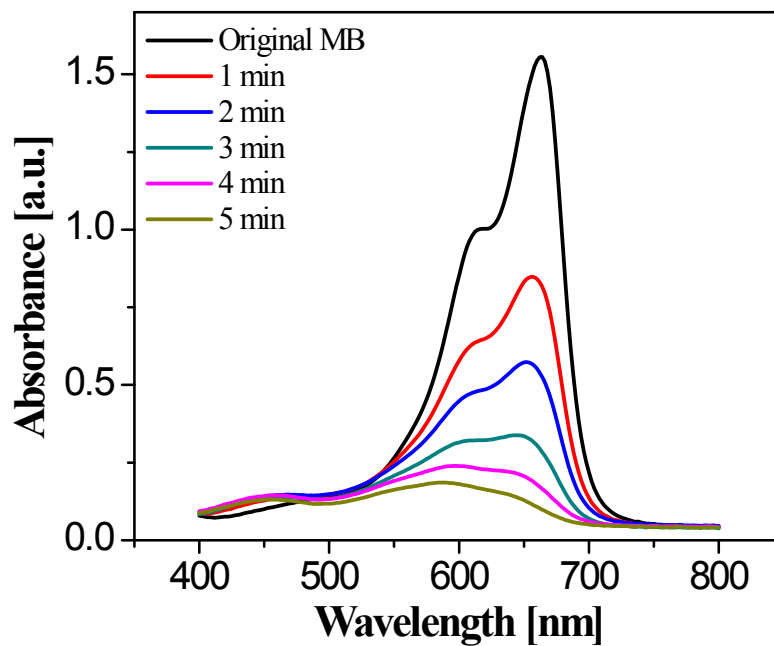

**Fig.S5** UV-Visible spectra of the MB solution before and after exposure to visible light irradiation using APO/NFO5 photocatalyst

**Table S1: Recyclability photocatalytic activity study of APO/NFO5**

| Catalyst | Experiment | MB degraded (%) |
|----------|------------|-----------------|
| APO/NFO  | First run  | 98              |
|          | Second run | 96              |
|          | Third run  | 95              |
